# Supplementary material
Source: PubMed Central journal article supplement (PMC4313231)
Supplement: JCM.01733-14_zjm999093821so1.pdf [file JCM.01733-14_zjm999093821so1.pdf]

Supplemental Table 1. Demographic and clinical characteristics of all patients with a surveillance record available, patients with a surveillance record who seroconverted to a SFGR, and patients with a surveillance record who did not seroconvert.

|                                | All patients<br>(n=53) | Seroconverters<br>(n=12) | Non-seroconverters<br>(n=41) |
|--------------------------------|------------------------|--------------------------|------------------------------|
| <b>DEMOGRAPHIC INFORMATION</b> |                        |                          |                              |
| Age – median (range)           | 50 (1 – 80)            | 49 (1 – 70)              | 51 (7 – 80)                  |
| Gender                         |                        |                          |                              |
| Male                           | 29/47 (61.7%)          | 7/10 (70.0%)             | 22/37 (59.5%)                |
| Female                         | 18/47 (38.3%)          | 3/10 (30.0%)             | 15/37 (40.5%)                |
| Race                           |                        |                          |                              |
| White                          | 45/53 (84.9%)          | 10/12 (83.3%)            | 35/41 (85.4%)                |
| Black                          | 3/53 (5.7%)            | 0/12 (0%)                | 3/41 (7.3%)                  |
| Other                          | 2/53 (3.8%)            | 2/12 (16.7%)             | 0/41 (0%)                    |
| Hispanic Ethnicity             | 3/42 (7.1%)            | 1/11 (9.1%)              | 2/31 (6.4%)                  |
| <b>CLINICAL INFORMATION</b>    |                        |                          |                              |
| Symptoms/clinical findings     |                        |                          |                              |
| Fever                          | 27/46 (58.7%)          | 8/11 (72.7%)             | 19/35 (54.3%)                |
| Headache                       | 14/36 (38.9%)          | 4/10 (40.0%)             | 10/26 (38.5%)                |
| Myalgias                       | 24/40 (60.0%)          | 6/10 (60.0%)             | 18/30 (60.0%)                |
| Skin rash                      | 16/41 (39.0%)          | 3/11 (27.3%)             | 13/30 (43.3%)                |
| Acute renal failure            | 2/29 (6.9%)            | 1/5 (20.0%)              | 1/24 (4.2%)                  |
| Thrombocytopenia               | 7/28 (25.0%)           | 3/6 (50.0%)              | 4/22 (18.2%)                 |
| Leukopenia                     | 5/26 (19.2%)           | 3/5 (60.0%)              | 2/21 (9.5%)                  |
| Anemia                         | 4/28 (14.3%)           | 2/6 (33.3%)              | 2/22 (9.1%)                  |
| Elevated liver enzymes         | 8/28 (28.6%)           | 2/5 (40.0%)              | 6/23 (26.1%)                 |
| Took antibiotics for illness   | 36/45 (80.0%)          | 9/9 (100%)               | 27/36 (75.0%)                |
| Patient hospitalized           | 7/48 (14.6%)           | 2/12 (16.7%)             | 5/36 (13.9%)                 |
| Died from illness              | 0/20 (0%)              | 0/5 (0%)                 | 0/15 (0%)                    |
